# Supplementary material for: Evaluation of The Antioxidant, Antimicrobial, and Anticancer Activities of Dicliptera bupleuroides Isolated Compounds Using In Vitro and In Silico Studies
Source: MDPI journal article supplement (doi:10.3390/molecules26237196), 2021-11-27
Supplement: s1 [file s1]

# Evaluation of the antioxidant, antimicrobial and anticancer activity of *Dicliptera bupleuroides* isolated compounds using *in vitro* and *in silico* studies

## Supplementary materials

**Figure S1:** <sup>1</sup>H NMR (A), DEPT-90 (B), DEPT-135 (C) and IR (D) spectra of  $\beta$ -sitosterol (**1**).

**Figure S2:** <sup>1</sup>H NMR (A) and IR (B) spectra of vanillic acid (**2**)

**Figure S3:** 2D and 3D binding mode of vanillic acid (**2**) within the active site of  $\beta$ -lactamase

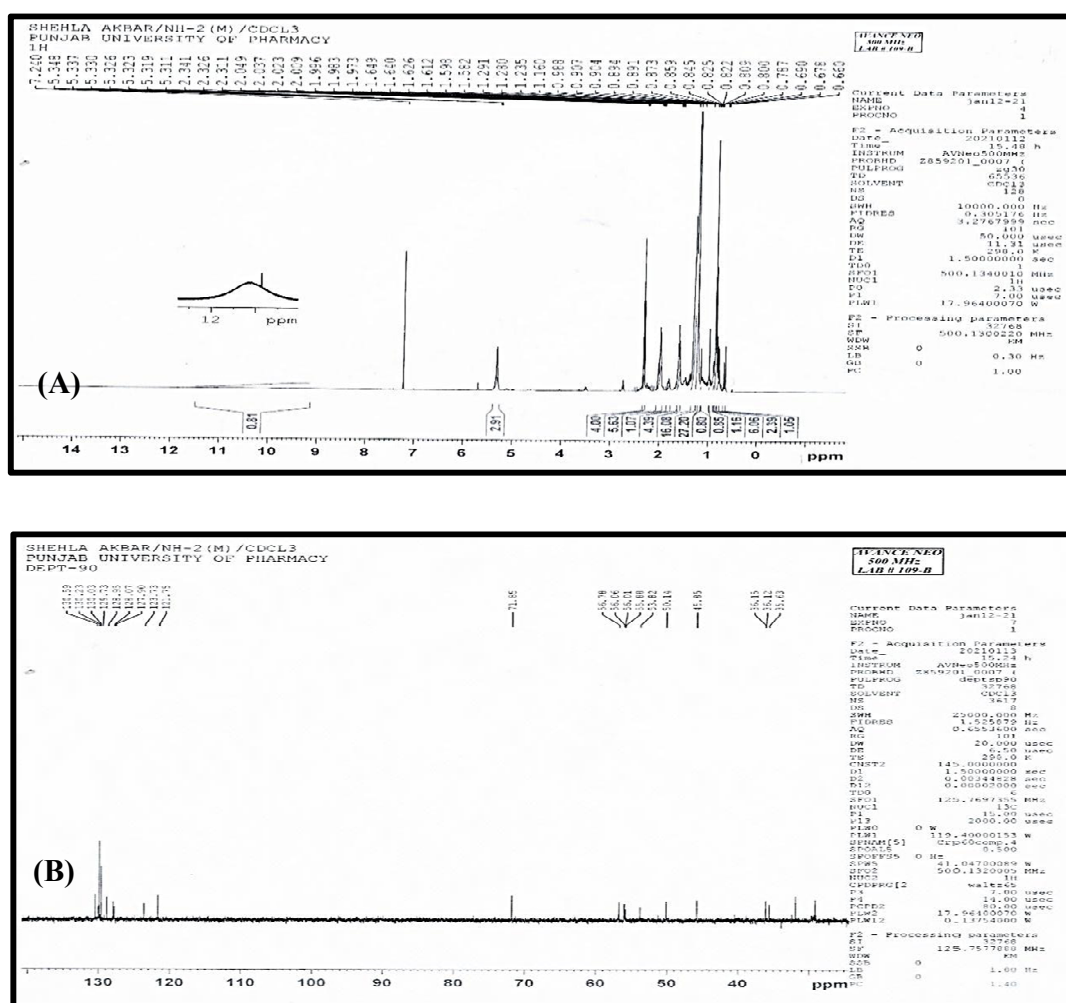

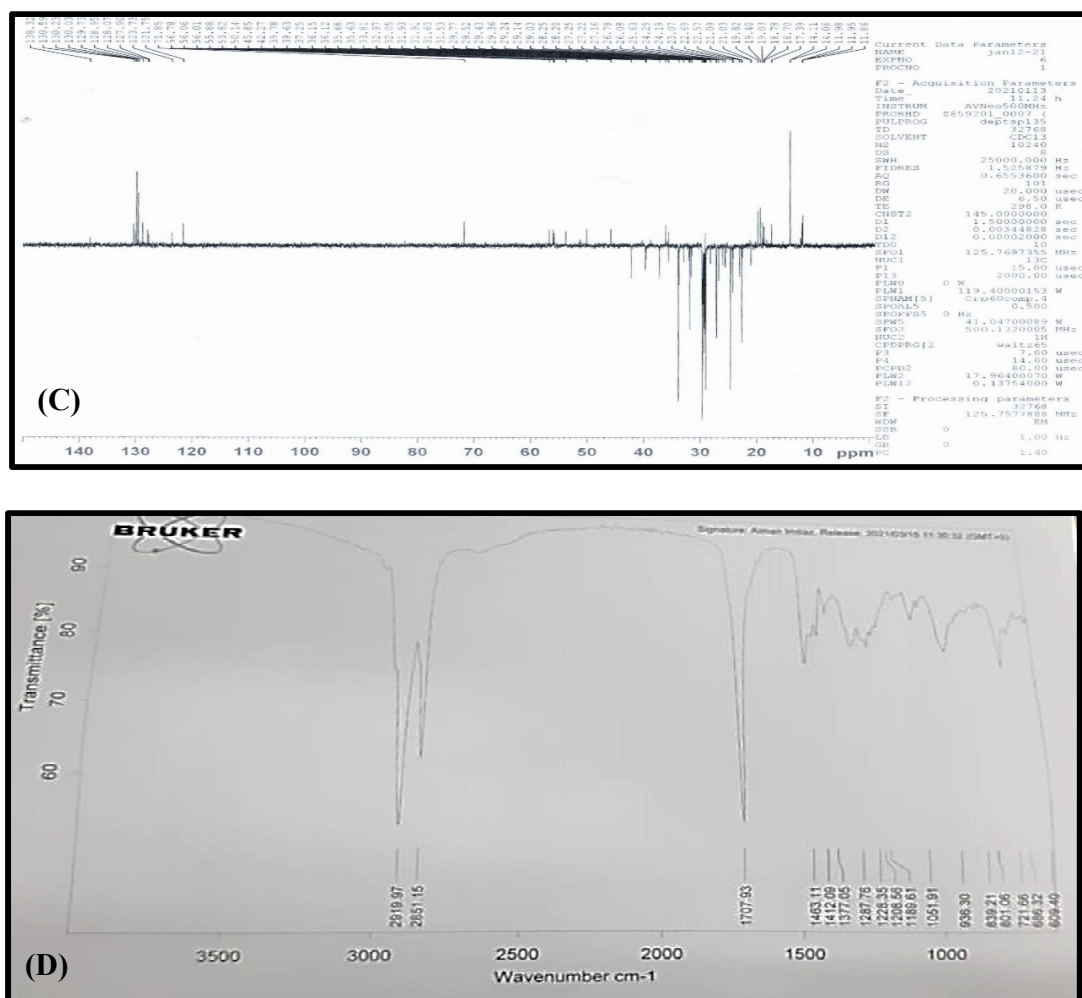

Figure S1  $^1\text{H}$  NMR (A), DEPT-90 (B), DEPT-135 (C) and IR (D) spectra of  $\beta$ -sitosterol (1).

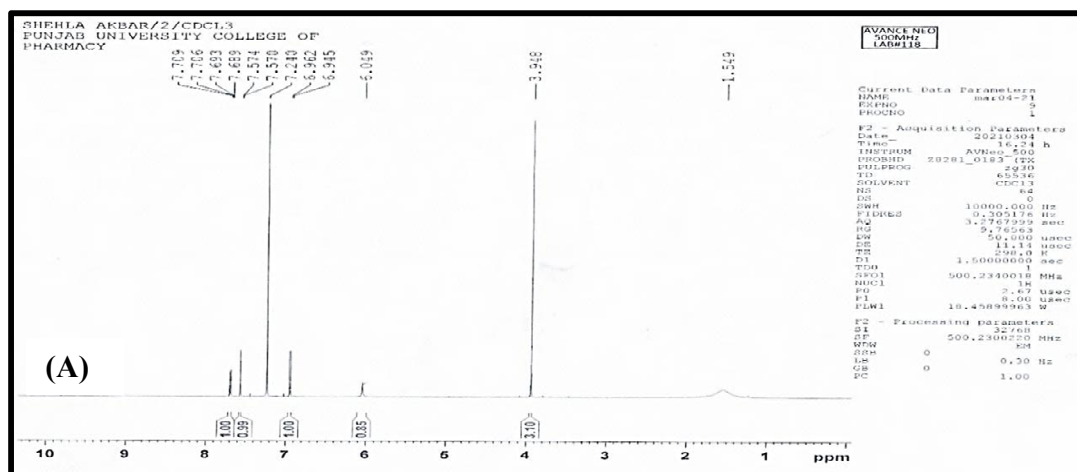

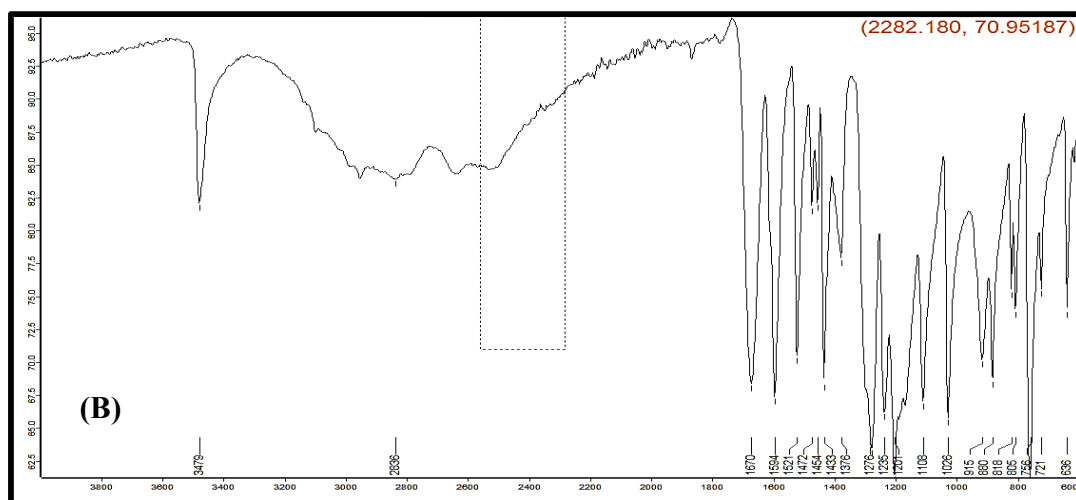

**Figure S2**  $^1\text{H}$  NMR (A) and IR (B) spectra of vanillic acid (**2**)

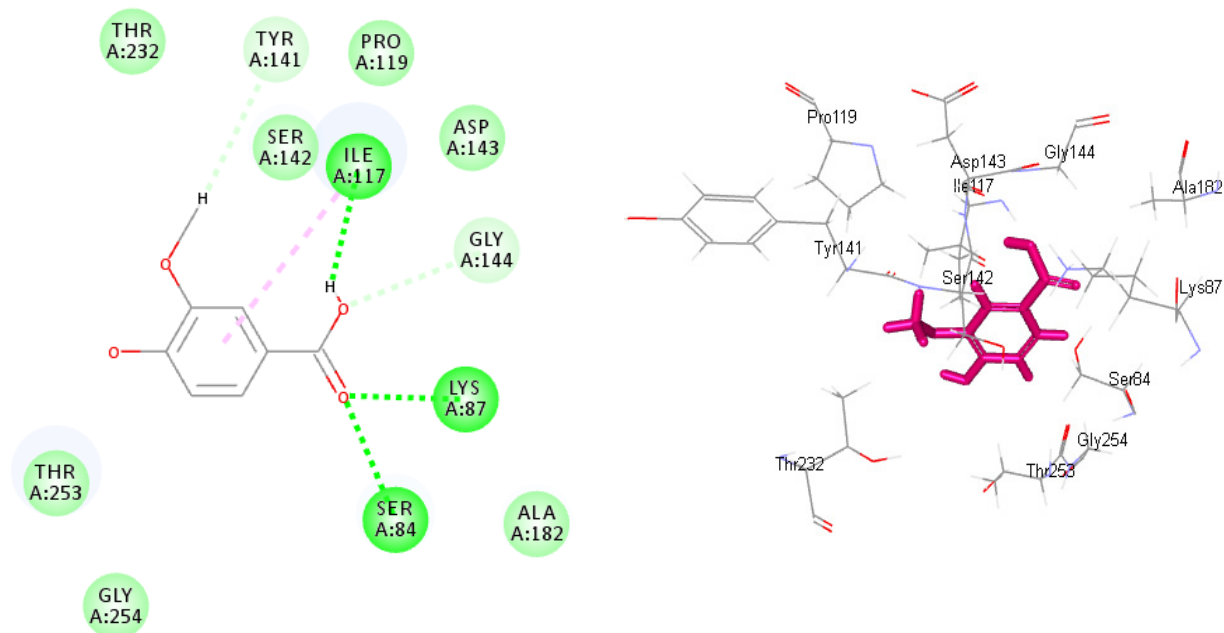

**Figure S3:** 2D and 3D binding mode of vanillic acid (**2**) within the active site of  $\beta$ -lactamase
